# Supplementary material for: Fabrication of ternary metal oxide (ZnO:NiO:CuO) nanocomposite heterojunctions for enhanced photocatalytic and antibacterial applications
Source: Royal Society of Chemistry journal article supplement (doi:10.1039/d3ra05170f), 2023-01-01
Supplement: d3ra05170f1.pdf [file d3ra05170f1.pdf]

## **Fabrication of Ternary Metal Oxide (ZnO:NiO:CuO) nanocomposite heterojunctions for enhanced photocatalytic and antibacterial applications**

Muhammad Zahid Ishaque , <sup>a</sup> Yasir Zaman, <sup>a\*</sup> Alia Arif, <sup>a</sup> Abu Bakar Siddique, <sup>b\*</sup> Muhammad Shahzad, <sup>f,a</sup> Daoud Ali, <sup>c</sup> Muhammad Aslam, <sup>e</sup> Hira Zaman <sup>d\*</sup>, Muhammad Faizan <sup>a</sup>

<sup>a</sup> Department of Physics, University of Sargodha, Sargodha,40100, Pakistan

<sup>b</sup> Institute of Chemistry, University of Sargodha, Sargodha,40100, Pakistan

<sup>c</sup> Department of Zoology, College of Science, King Saud University, PO Box 2455, Riyadh 11451, Saudi Arabia

<sup>d</sup> Institute of Chemical Sciences, University of Peshawar, Khyber Pakhtunkhwa, 25120, Pakistan

<sup>e</sup> Institute of Physics and Technology, Ural Federal University, Mira Str.19, 620002 Yekaterinburg, Russia

Corresponding Authors:

1. Abu Bakar Siddique - Institute of Chemistry, University of Sargodha, Sargodha 40100, Pakistan; <https://orcid.org/0000-0003-2834-5708> ; Email: [abubakar.siddique@uos.edu.pk](mailto:abubakar.siddique@uos.edu.pk)
2. Hira Zaman - Institute of Chemical Sciences, University of Peshawar, Khyber Pakhtunkhwa, 25120, Pakistan; Email: [hizamkhan@yahoo.com](mailto:hzamkhan@yahoo.com)
3. Yasir Zaman - Department of Physics, University of Sargodha, Sargodha,40100, Pakistan; Email: [yasir.zaman@uos.edu.pk](mailto:yasir.zaman@uos.edu.pk)

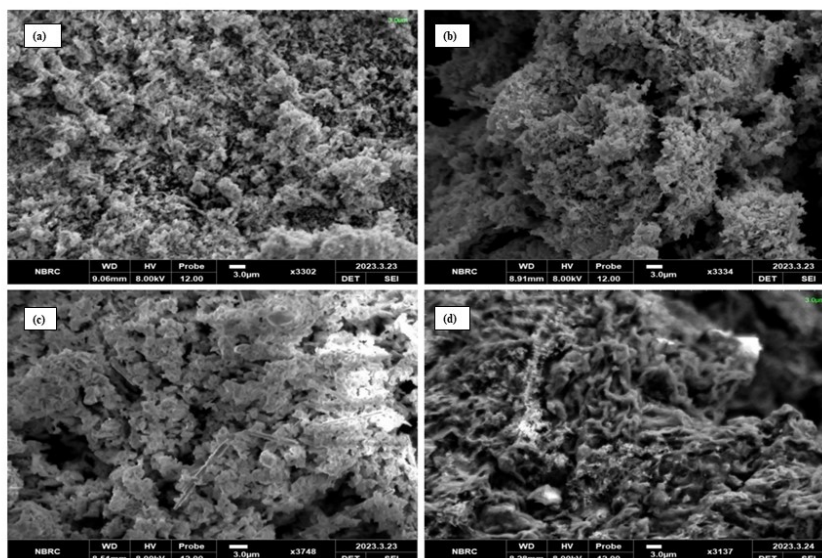

**Fig. S1:** SEM images of samples with molar ratios (Zn:Ni:Cu) (a) 1:1:1, (b) 2:1:1, (c) 1:2:1, and (d) 1:1:2

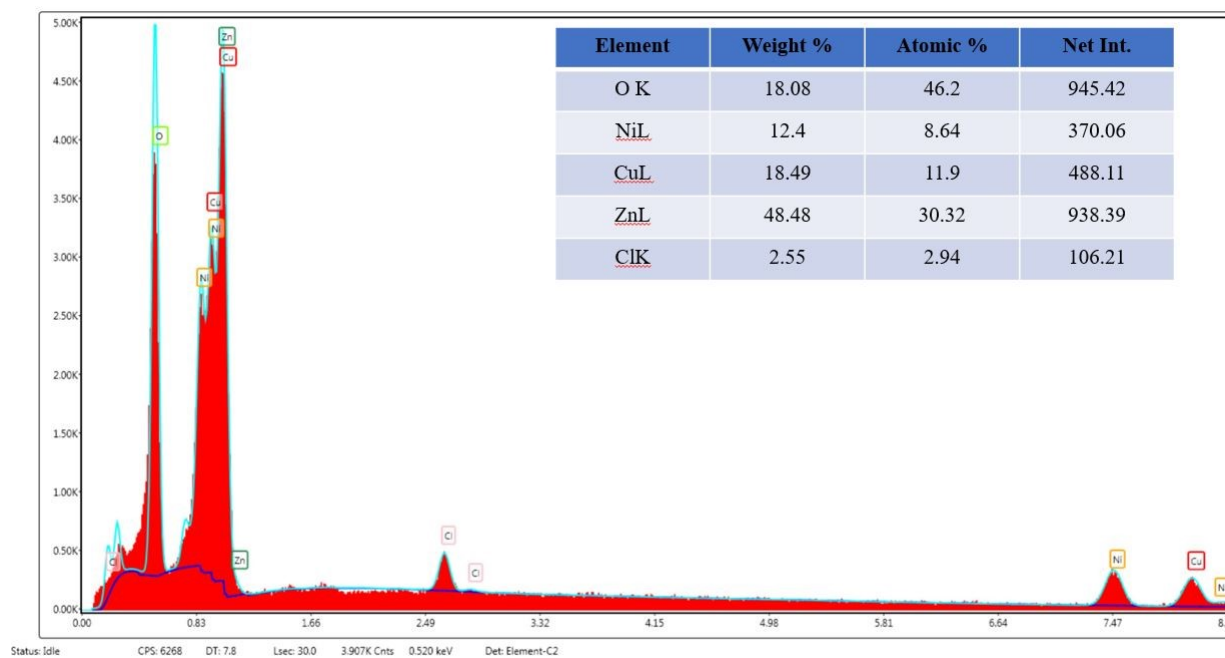

**Fig. S2:** EDX spectra of ZNC (2:1:1)

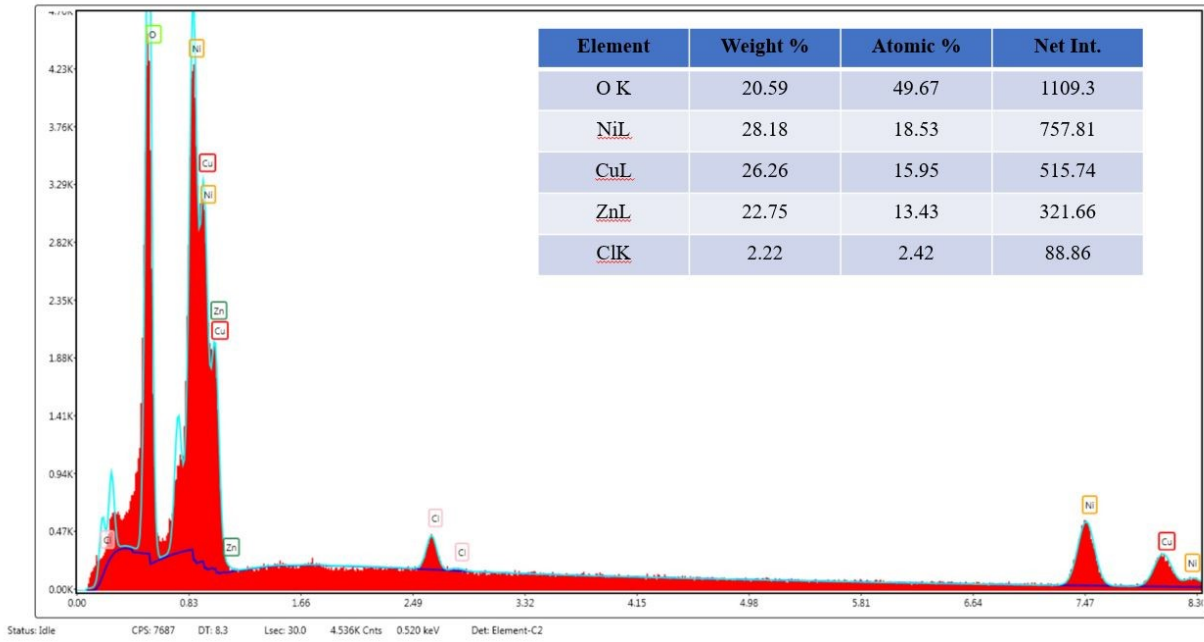

**Fig. S3:** EDX spectra of ZNC (1:2:1)

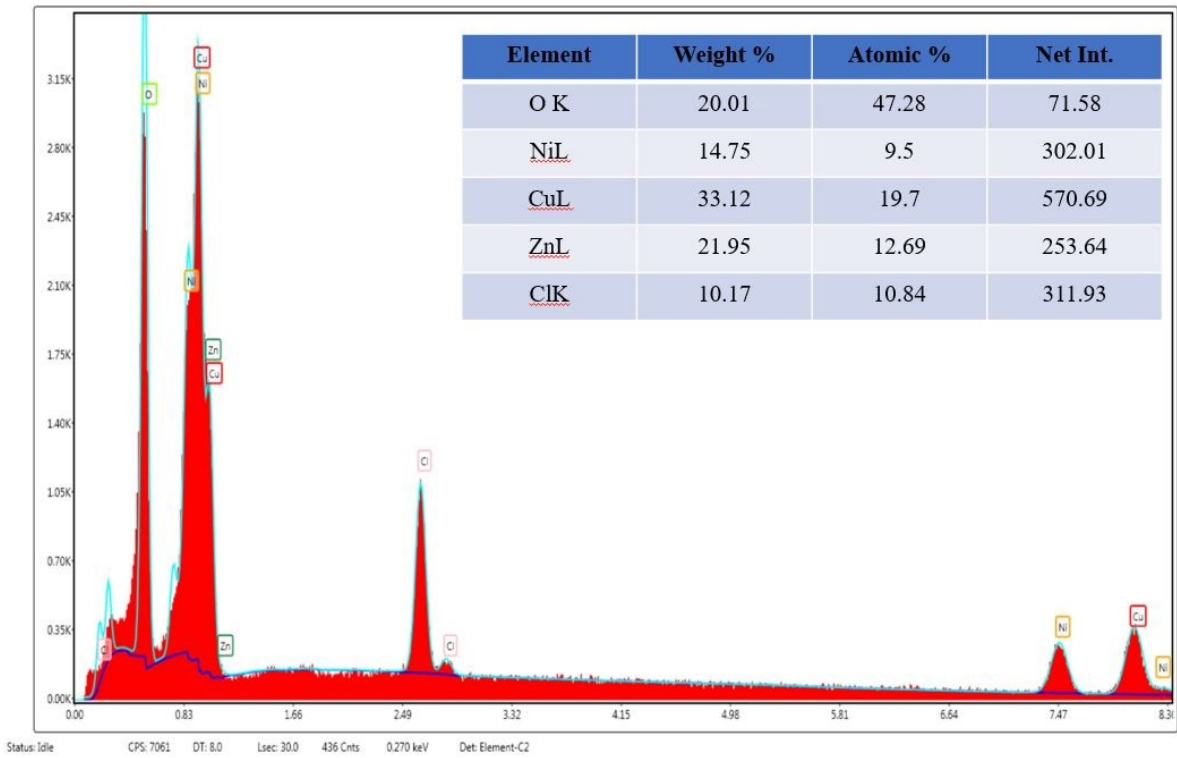

**Fig. S4:** EDX spectra of ZNC (1:1:2)

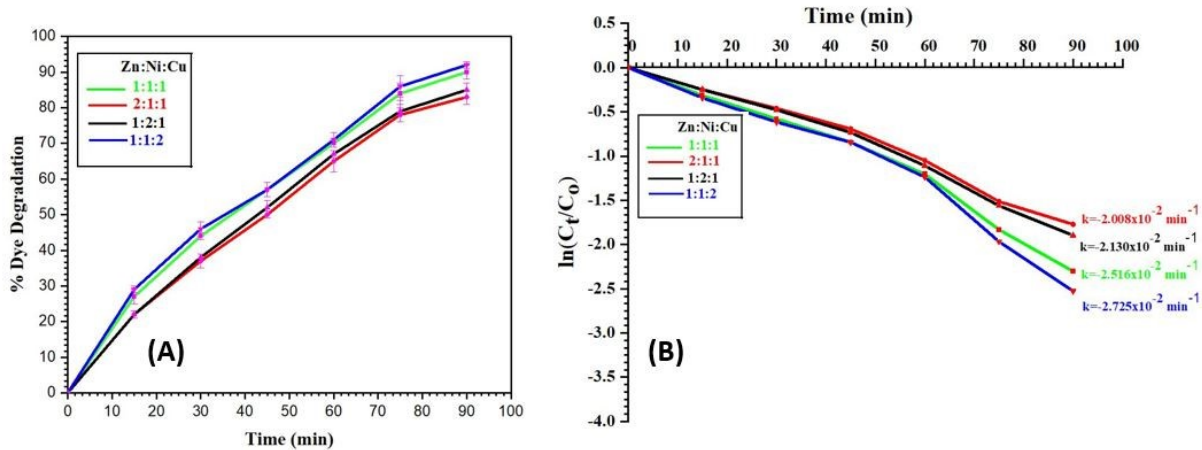

**Fig. S5:** (a) % degradation of MB dye in mixture; (b) rate constant plot of MB dye degradation in mixture

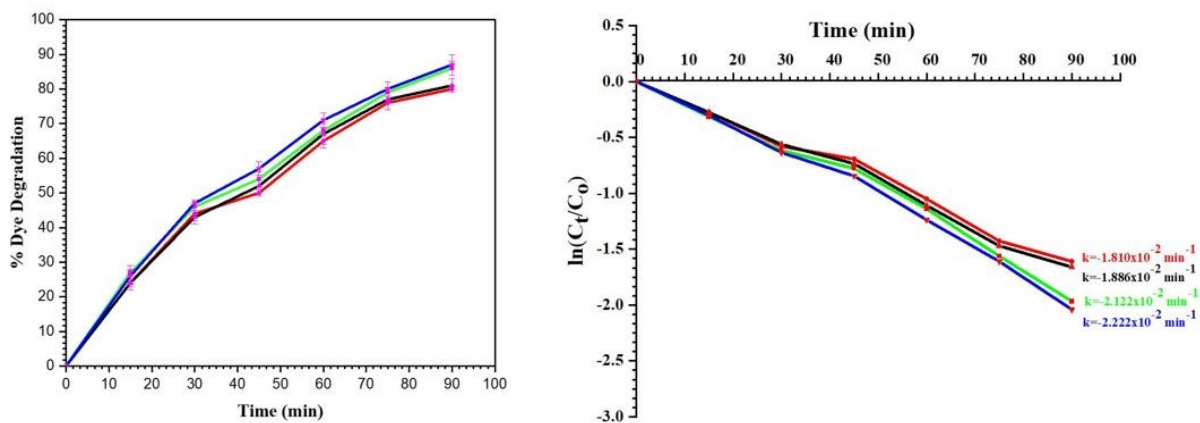

**Fig. S6:** (a) % degradation of MO dye in mixture; (b) rate constant plot of MO dye degradation in mixture
